# Supplementary material for: The resilience of two departmental health insurance units during the COVID-19 pandemic in Senegal
Source: HighWire-hosted journal article supplement (doi:10.1136/bmjgh-2022-010062), 2022-12-01
Supplement: bmjgh-2022-010062supp001_data_supplement.pdf [file bmjgh-2022-010062supp001_data_supplement.pdf]

### Authors' reflexivity statement

The research and the production of this article were carried out following the most recent best practices of international collaboration. Although the French Development Agency financed the entire research, the research question corresponds to the knowledge needs put forward by the managers of the UDAMs and the national managers of the Universal Health Coverage. The UDAMs, through their participation in the research process, contributed to the entire study, from the production of the research question to the data collection, analysis, and interpretation of the findings. The study was carried out with the fair participation and collaboration of the international researchers (French: VR and Senegalese: AF), the research assistant (BK), and the managers of the UDAMs of Foundiougne (NBM) and Kounghoul (IS). The research assistant (BK) was trained and supported by VR in data collection and analysis. All results were interpreted by the UDAM leaders who participated in the writing of the article. The order of authorship reflects a fair distribution of the intellectual contribution of the co-authors in the research process. VR and AF coordinated the overall research in collaboration with the co-authors. VR took the lead in writing the article, but all authors participated in writing and validating the content, and AF was the final author. The article was initially written in French to allow authors who do not speak English to participate in its writing. BK and the two directors of the UDAMs (IS and NBM) had their research and scientific writing skills strengthened by their participation in this study. The results of the study attempt to show the resilience of the UDAMs, which will have a practical implication on their functioning and scaling-up as one of the solutions for the UHC. We considered all ethical issues, and the interview participants' anonymity was respected.
